# Supplementary material
Source: PubMed Central journal article supplement (PMC6128732)
Supplement: NIHMS979942-supplement-5.pdf [file NIHMS979942-supplement-5.pdf]

## Supplementary Tables

Supplementary Table 1:  $k_{on}$  and  $k_{off}$  Values for Human/*Xenopus* XLF L115/117A

| Concentration (nM) |                             | <i>Xenopus</i> XLF <sup>1-226</sup>          |                                              | Human XLF <sup>1-224</sup>                   |                                              |
|--------------------|-----------------------------|----------------------------------------------|----------------------------------------------|----------------------------------------------|----------------------------------------------|
|                    |                             | wild type                                    | L117A                                        | wild type                                    | L115A                                        |
| 2000               | $k_{on}$ ( $s^{-1}M^{-1}$ ) | $218.9 \times 10^3 \pm 1.9 \times 10^3$      | $229.2 \times 10^3 \pm 0.5 \times 10^3$      | $272.1 \times 10^3 \pm 7.1 \times 10^3$      | $226.1 \times 10^3 \pm 12.1 \times 10^3$     |
|                    | $k_{off}$ ( $s^{-1}$ )      | $69.0 \times 10^{-3} \pm 5.8 \times 10^{-3}$ | $59.7 \times 10^{-3} \pm 9.2 \times 10^{-3}$ | $56.7 \times 10^{-3} \pm 0.8 \times 10^{-3}$ | $46.2 \times 10^{-3} \pm 1.9 \times 10^{-3}$ |
| 250                | $k_{on}$ ( $s^{-1}M^{-1}$ ) | $312.6 \times 10^3 \pm 7.9 \times 10^3$      | $342.8 \times 10^3 \pm 8.7 \times 10^3$      | $294.5 \times 10^3 \pm 11.6 \times 10^3$     | $233.8 \times 10^3 \pm 1.7 \times 10^3$      |
|                    | $k_{off}$ ( $s^{-1}$ )      | $49.5 \times 10^{-3} \pm 0.4 \times 10^{-3}$ | $42.1 \times 10^{-3} \pm 2.3 \times 10^{-3}$ | $36.2 \times 10^{-3} \pm 1.0 \times 10^{-3}$ | $27.4 \times 10^{-3} \pm 1.3 \times 10^{-3}$ |
|                    | Apparent $K_d$ (M)          | $2.4 \times 10^{-7} \pm 0.5 \times 10^{-7}$  | $1.9 \times 10^{-7} \pm 0.4 \times 10^{-7}$  | $1.7 \times 10^{-7} \pm 0.3 \times 10^{-7}$  | $1.6 \times 10^{-7} \pm 0.3 \times 10^{-7}$  |

The  $k_{on}$  and  $k_{off}$  values reported in Table 1 are averaged from two experimental replicates for each condition, and the reported error represents the minimum and maximum values. The apparent  $K_d$  values for each sample are averaged from both replicates at both concentration points. The error represents the standard error of the mean.

Supplementary Table 2: Sample sizes for smFRET kinetics experiments, Fig. 2B-C.

| Condition                                     | Number of trials | Total substrate molecules imaged |
|-----------------------------------------------|------------------|----------------------------------|
| $\Delta$ XLF                                  | 3                | 6436                             |
| $\Delta$ XLF + XLF <sup>WT</sup>              | 3                | 8302                             |
| XLF <sup>L117D</sup>                          | 2                | 5136                             |
| XLF <sup>L68D</sup>                           | 2                | 6025                             |
| $\Delta$ XRCC4                                | 3                | 8536                             |
| $\Delta$ XRCC4 + XRCC4 <sup>WT</sup> :LIG4    | 5                | 15078                            |
| $\Delta$ XRCC4 + XRCC4 <sup>K104E</sup> :LIG4 | 4                | 9478                             |
| $\Delta$ XRCC4 + XRCC4 <sup>F111E</sup> :LIG4 | 3                | 12009                            |

Supplementary Table 3: Sample sizes for smFRET experiments, Fig. 2E and 4D

| Sample                        | $\Delta$ XRCC4+ XRCC4 <sup>WT</sup> :LIG4 <sup>K278R</sup> | $\Delta$ XRCC4+ XRCC4 <sup>K104E</sup> :LIG4 <sup>K278R</sup> | $\Delta$ XLF + tdXLF <sup>WT/WT</sup> | $\Delta$ XLF + tdXLF <sup>WT/L68D,L117D</sup> |
|-------------------------------|------------------------------------------------------------|---------------------------------------------------------------|---------------------------------------|-----------------------------------------------|
| Molecules Tracked             | 1026                                                       | 3539                                                          | 365                                   | 414                                           |
| High FRET Events              | 374                                                        | 456                                                           | 107                                   | 10                                            |
| SR-complex Lifetimes Measured | 81                                                         | 50                                                            | N/A                                   | N/A                                           |
| Replicates                    | 5                                                          | 14                                                            | 2                                     | 2                                             |

### Supplementary Table 4: Plasmids

All NHEJ factors listed below are the *Xenopus laevis* orthologs unless otherwise noted.

| Designation | Name                                                    | Source | Notes/associated figure(s)<br>(Supplementary Figures are indicated by "S")                                                     |
|-------------|---------------------------------------------------------|--------|--------------------------------------------------------------------------------------------------------------------------------|
| pTG024      | pBluescript II KS(-) derivative ("pBS-RON")             | 5      | Used as carrier DNA in all end joining experiments and as the source of the small DNA fragment in Supplementary Fig. 1D and 1E |
| pTG064      | <i>parS</i> /pBluescript II KS(-)                       | 1      | Template for generating biotinylated DNA fragment in Supplementary Fig. 1D, 3E                                                 |
| pTG275      | Flag-LIG4-H6/pFastBac1                                  | 1      | 1C; 2C                                                                                                                         |
| pTG276      | XRCC4-StrepII/pFastBac1                                 | 1      | 1C; 2C                                                                                                                         |
| pTG296      | H10-SUMO-XLF                                            | 1      | 1D; 2B; 3D; S1A, C-D, H-I; S2A; S3D-E; S4A                                                                                     |
| pTG322      | XRCC4 <sup>K104E</sup> -StrepII/pFastBac1               | 2      | 1C; 2C                                                                                                                         |
| pTG324      | pBirAcm                                                 | 3      | 1A; S1B,E-F                                                                                                                    |
| pTG329      | H10-SUMO-XRCC4-Avitag                                   | 2      | 1A; S1B,E-F                                                                                                                    |
| pTG330      | H10-SUMO-XRCC4 <sup>K104E</sup>                         | 2      | S1C,D,G                                                                                                                        |
| pTG339      | H10-SUMO-XLF <sup>L117D</sup>                           | 2      | 1D; 2B; S1A,C-D;                                                                                                               |
| pTG343      | H10-SUMO-Halo-XLF                                       | 2      | 3A-C                                                                                                                           |
| pTG349      | H10-SUMO-XRCC4 <sup>K104E</sup> -Avitag                 | 2      | 1A; S1E-F                                                                                                                      |
| pTG355      | H10-XLF                                                 | 2      | S4C-D                                                                                                                          |
| pTG357      | Flag-XLF                                                | 2      | S4C-D                                                                                                                          |
| pTG369      | H10-SUMO-XLF <sup>L68D</sup>                            | 2      | 1D; 2B                                                                                                                         |
| pTG370      | H10-SUMO-XLF <sup>1-226</sup>                           | 2      | 1A; S1B,E-G                                                                                                                    |
| pTG371      | H10-SUMO-XLF <sup>1-226,L117D</sup>                     | 2      | 1A; S1G                                                                                                                        |
| pTG373      | XRCC4 <sup>F111E</sup> -StrepII/pFastBac1               | 2      | 1C; 2C                                                                                                                         |
| pTG387      | H10-SUMO-Avitag-Halo                                    | 2      | 3A-C; S2C-F                                                                                                                    |
| pTG393      | H10-SUMO-XRCC4 <sup>F111E</sup>                         | 2      | S1C-D,G                                                                                                                        |
| pTG436      | H10-SUMO-XLF <sup>1-226,L68D</sup>                      | 2      | 1A; S1G                                                                                                                        |
| pTG437      | H10-SUMO-XLF <sup>1-226,L117A</sup>                     | 2      | 5C; Supplementary Table 3                                                                                                      |
| pTG441      | H10-SUMO-XRCC4 <sup>F111E</sup> -Avitag                 | 2      | 1A                                                                                                                             |
| pTG448      | H10-XLF <sup>WT</sup> :Flag-Avitag-XLF <sup>WT</sup>    | 2      | S4E-F                                                                                                                          |
| pTG449      | H10-XLF <sup>WT</sup> :Flag-Avitag-XLF <sup>L117D</sup> | 2      | S4E-F                                                                                                                          |
| pTG454      | H10-SUMO-tdXLF <sup>WT/WT</sup>                         | 2      | 4B-D; S4A-B                                                                                                                    |
| pTG458      | H10-SUMO-tdXLF <sup>WT/L68D,L117D</sup>                 | 2      | 4B-D; S4A                                                                                                                      |
| pTG459      | H6-SUMO-humanXLF <sup>1-224,L115D</sup>                 | 2      | 5C                                                                                                                             |
| pTG461      | H6-SUMO-humanXRCC4-Avitag                               | 2      | 5C; Supplementary Table 3                                                                                                      |
| pSC7        | H6-SUMO-humanXLF <sup>1-224,L115A</sup>                 | 2      | 5C; Supplementary Table 3                                                                                                      |
| pSC8        | H6-SUMO-humanXLF <sup>1-224</sup>                       | 2      | 5C; Supplementary Table 3                                                                                                      |

|        |                                               |   |      |
|--------|-----------------------------------------------|---|------|
| pBMS49 | H10-SUMO-LIG4 <sup>K278R</sup> :XRCC4/pETDuet | 4 | 2D-E |
|--------|-----------------------------------------------|---|------|

Sources:

- 1) Graham, T. G. W., Walter, J. C. & Loparo, J. J. Two-Stage Synapsis of DNA Ends during Non-homologous End Joining. *Mol. Cell* **61**, 850–8 (2016).
- 2) This work
- 3) Avidity, LLC
- 4) Benjamin Stinson
- 5) Courtney Havens
