# Supplementary material
Source: PubMed Central journal article supplement (PMC6128732)

Figure 1C

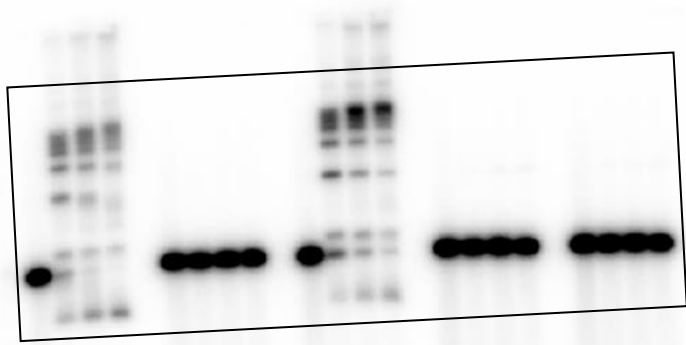

Figure 1D

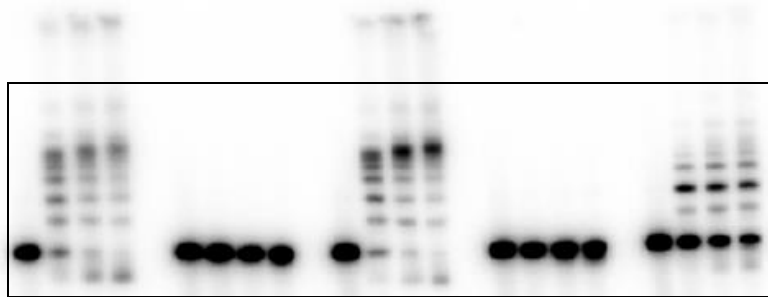

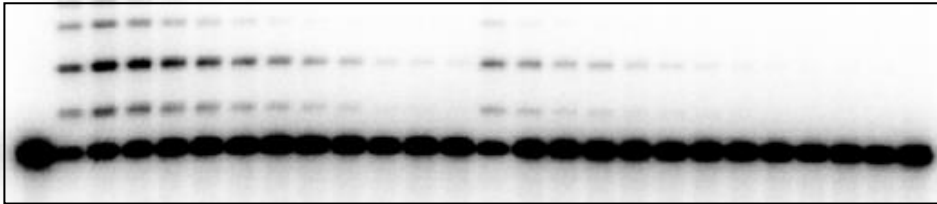

Figure 4B

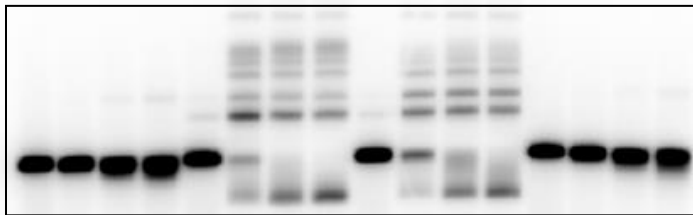

Figure 5A

1000bp-Biotin DNA + Streptavidin

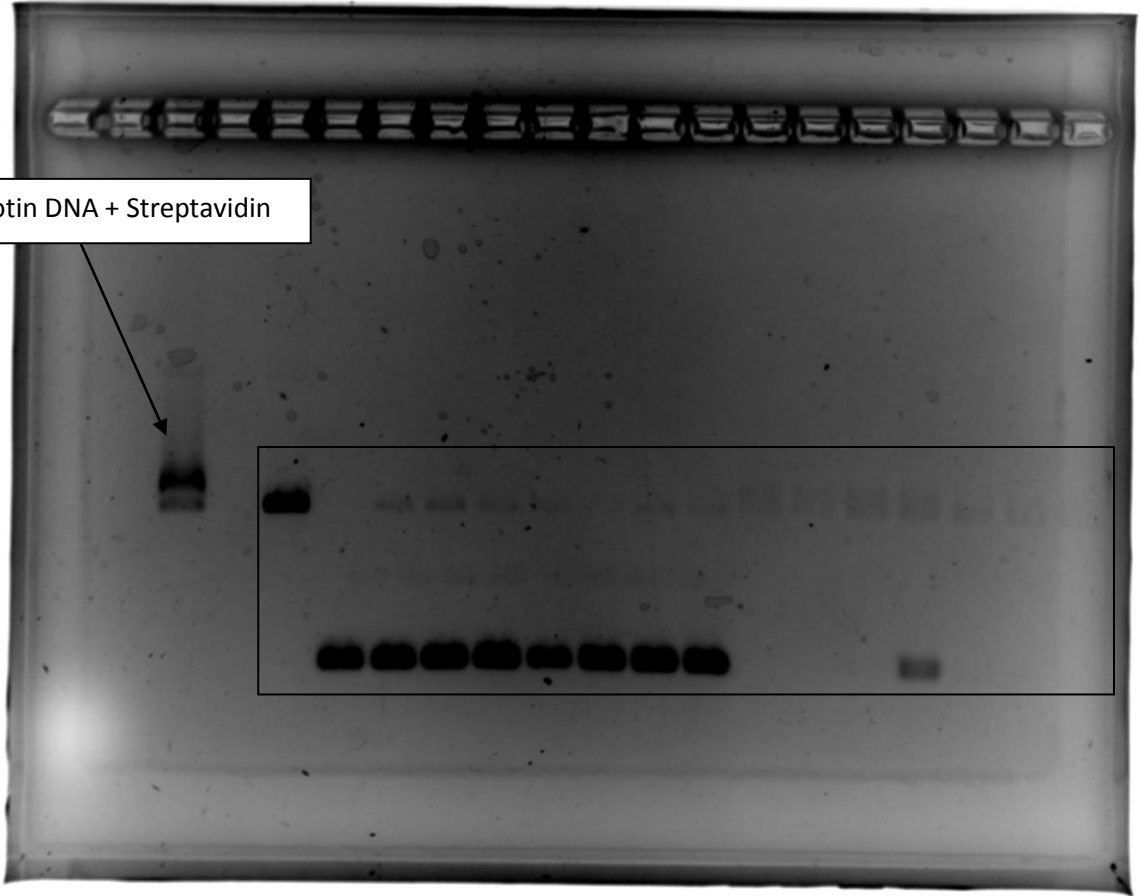

Figure 5B

Supplement: NIHMS979942-supplement-3.pdf [file NIHMS979942-supplement-3.pdf]
